# Supplementary material for: An ecofriendly and universal strategy to balance the active sites and electrical conductivity of biomass-derived carbon for superior lithium storage
Source: Royal Society of Chemistry journal article supplement (doi:10.1039/d3nj02187d), 2023-01-01
Supplement: d3nj02187d1.pdf [file d3nj02187d1.pdf]

## Supplementary Information

### **An ecofriendly and universal strategy to balance the active sites and electric conductivity of biomass-derived carbon for superior lithium storage**

*Xi Chen<sup>a</sup>, Yanmeng Zhang<sup>a</sup>, Heng Zhang<sup>a</sup>, Song Yang<sup>a</sup>, Tao Li<sup>b\*</sup>, Bing Sun<sup>a\*</sup>, Shibing Ni<sup>a\*</sup>*

<sup>a</sup> College of Materials and Chemical Engineering, Key Laboratory of Inorganic Nonmetallic Crystalline and Energy Conversion Materials, China Three Gorges University, Yichang, 443002, China.

<sup>b</sup> Analysis and Testing Center, China Three Gorges University, Yichang, 443002, China.

E-mail addresses: [litaoctgu@126.com](mailto:litaoctgu@126.com) (Tao Li); [bsun1010@sina.cn](mailto:bsun1010@sina.cn) (Bing Sun); [shibingni07@126.com](mailto:shibingni07@126.com) (Shibing Ni).

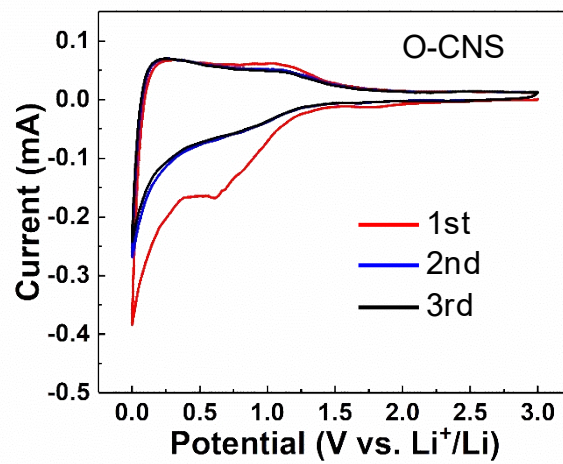

Figure S1. CV curves of the O-CNS electrode at the scan rate of  $0.2 \text{ mV s}^{-1}$ .

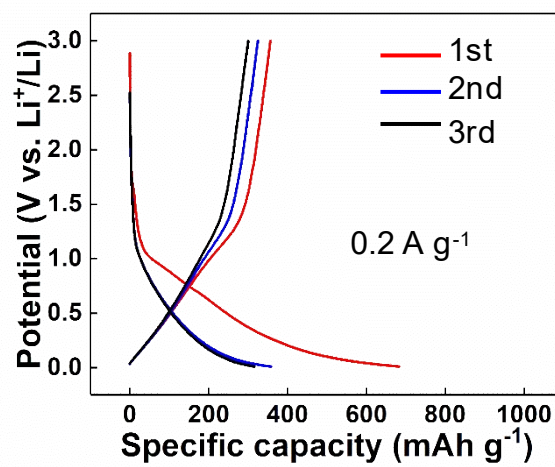

Figure S2. The voltage profiles of the O-CNS electrode tested at the current density of  $0.2 \text{ A g}^{-1}$  in the first three cycles.

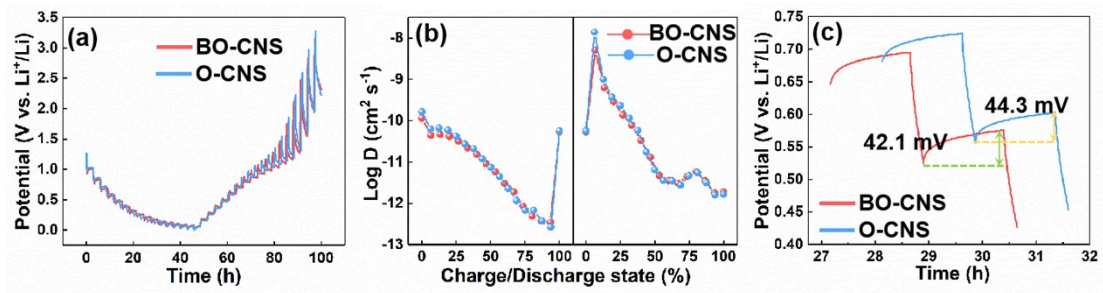

Figure S3. (a) GITT potential profiles, (b) diffusion coefficients calculated from the GITT profiles during charge/discharge processes of the obtained electrodes, and (c) the potential drop of BO-CNS and O-CNS electrodes.

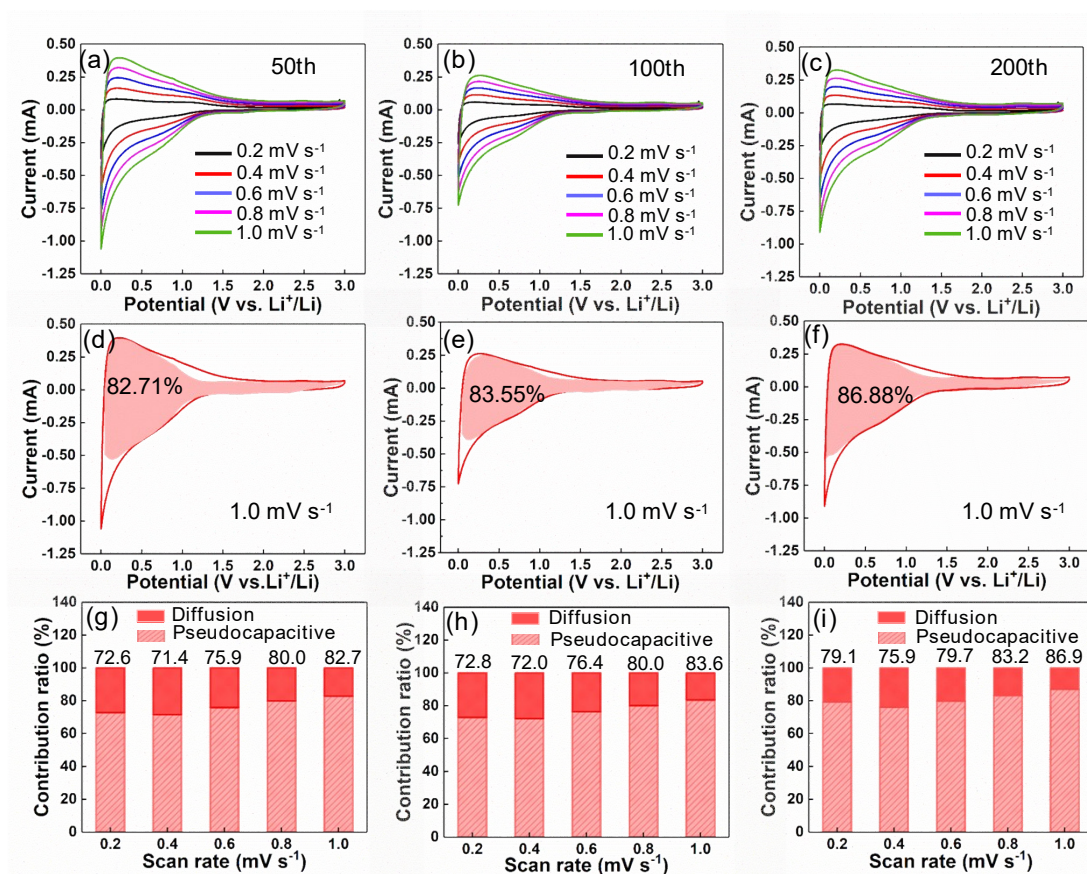

Figure S4. Li-ion storage electrochemistry of the BO-CNS electrode. (a–c) CV curves at different scan rate. (d–f) Fitted pseudocapacitive contribution in charge storage at

1.0 mV s<sup>-1</sup>. (g–i) Pseudocapacitive charge storage contribution vs. scan rate. After 50 cycles (a, d, g,), after 100 cycles (b, e, h,), and for electrode after 200 cycles (c, f, i).

Table S1. The contents of the B, O, and C elements based on XPS results.

| Elements | B (at.%) | C (at.%) | O (at.%) |
|----------|----------|----------|----------|
| Contents | 6.36     | 77.22    | 16.42    |

Table S2. Electrochemical properties of biomass-derived carbons used as anodes in LIBs.

| Sample            | Current Density<br>(mA g <sup>-1</sup> ) | Cycle<br>number | Capacity retention<br>(mAh g <sup>-1</sup> ) | Reference |
|-------------------|------------------------------------------|-----------------|----------------------------------------------|-----------|
| Natural cotton    | 37.2                                     | 100             | 246                                          | [1]       |
| Spruce            | 77.4                                     | 70              | 195                                          | [2]       |
| Banana peel waste | 77.4                                     | 200             | 272                                          | [3]       |
| Rice-starch       | 111.6                                    | 50              | 280                                          | [4]       |
| Sucrose           | 50                                       | 100             | 135                                          | [5]       |
| Loofah            | 100                                      | 200             | 225                                          | [6]       |
| Popped rice       | 100                                      | 150             | 383                                          | [7]       |
| Navel orange peel | 500                                      | 500             | 234                                          | [8]       |
| cotton stalk      | 100                                      | 100             | 328                                          | [9]       |
| Waste biomass     | 100                                      | 200             | 131                                          | [10]      |
| BO-CNS            | 200                                      | 300             | 331                                          | This work |
|                   | 6000                                     | 1000            | 220                                          |           |

## Reference

[1] Y. Liao, J. Hu, X. Zhou, Porous hard carbon microtubes from renewable cotton as high-performance anode material for lithium-ion batteries, *J. Mater. Sci.: Mater. Electron.* 32(2) (2021) 1631-1640.

[2] M. Drews, J. Büttner, M. Bauer, J. Ahmed, R. Sahu, C. Scheu, S. Vierrath, A. Fischer, D. Biro,

- Spruce hard carbon anodes for lithium-ion batteries, *Chemelectrochem* 8(24) (2021) 4750-4761.
- [3] F. Luna-Lama, J. Morales, A. Caballero, Biomass porous carbons derived from banana peel waste as sustainable anodes for lithium-ion batteries, *Materials* 14(20) (2021) 5995.
- [4] J. Luo, L. Wang, S. Lai, Z. Sun, H. Guo, Y. Lai, L. Zhu, P. Liu, Enzymatic preparation of rice-starch-based surface-modified disordered carbon as an anode for lithium-ion batteries, *Ionics* 27(1) (2021) 59-64.
- [5] R. Kumar, K. Anish Raj, S. Mita, P. Bhargava, Carbon derived from sucrose as anode material for lithium-ion batteries, *J. Electron. Mater.* 48(11) (2019) 7389-7395.
- [6] Z. Wu, L. Wang, J. Huang, J. Zou, S. Chen, H. Cheng, C. Jiang, P. Gao, X. Niu, Loofah-derived carbon as an anode material for potassium ion and lithium ion batteries, *Electrochim. Acta* 306 (2019) 446-453.
- [7] R. Boonprachai, T. Autthawong, O. Namsar, C. Yodbunork, W. Yodying, T. Sarakonsri, Natural porous carbon derived from popped rice as anode materials for lithium-ion batteries, *Crystals* 12(2) (2022) 223.
- [8] Y. Gao, S. Piao, C. Jiang, Z. Zou, Navel orange peel-derived hard carbons as high performance anode materials of Na and Li-ion batteries, *Diam. Relat. Mater.* 129 (2022) 109329.
- [9] H. Chang, H. Deng, Y. Wang, S. Wang, L. Cao, Z. Dong, T. Tan, Synthesis of large mesoporous carbon from cotton stalk for use as an anode for lithium-ion batteries, *Biomass and Bioenerg.* 167 (2022) 106641.
- [10] L. Tao, Y. Huang, X. Yang, Y. Zheng, C. Liu, M. Di, Z. Zheng, Flexible anode materials for lithium-ion batteries derived from waste biomass-based carbon nanofibers: I. Effect of carbonization temperature, *RSC Adv.* 8(13) (2018) 7102-7109.
